# Supplementary material for: A water-soluble two-photon fluorescence chemosensor for ratiometric imaging of mitochondrial viscosity in living cells
Source: Royal Society of Chemistry journal article supplement (doi:10.1039/c6tb01240j), 2016-01-01

## Supporting Information

### **A water-soluble two-photon fluorescence chemosensor for ratiometric imaging mitochondrial viscosity in living cells**

**Meng Zhao,<sup>a</sup> Yingzhong Zhu,<sup>a</sup> Jian Su,<sup>a</sup> Qian Geng,<sup>b</sup> Xiaohe Tian<sup>\*,b</sup>, Jun Zhang,<sup>c</sup> Hongping  
Zhou,<sup>a</sup> Shengyi Zhang,<sup>a</sup> Jieying Wu,<sup>a</sup> Yupeng Tian<sup>\*a</sup>**

## **Contents**

|                                                                                                            |    |
|------------------------------------------------------------------------------------------------------------|----|
| Materials and measurements.....                                                                            | 2  |
| Crystal data and structure refinements for <b>EIN</b> .....                                                | 3  |
| The asymmetric unit of <b>EIN</b> .....                                                                    | 4  |
| Selected bond lengths /Å and angles /° for <b>EIN</b> .....                                                | 4  |
| The linear absorption and emission spectra of <b>EIN</b> in H <sub>2</sub> O buffered with<br>HEPES.....   | 5  |
| The linear absorption of <b>EIN</b> in H <sub>2</sub> O buffered with HEPES pure glycerol<br>solution..... | 5  |
| The linear absorption and emission spectra of <b>EIN</b> in different solvents.....                        | 6  |
| Single-photon-related photophysical properties of <b>EIN</b> in different solvents.....                    | 6  |
| The linear response of <b>EIN</b> .....                                                                    | 6  |
| The fluorescent intensities for <b>EIN</b> at varied pH values.....                                        | 7  |
| The two-photon fluorescence spectra of <b>EIN</b> .....                                                    | 7  |
| Fluorescence responses of <b>EIN</b> to various bioanalytes.....                                           | 8  |
| Cytotoxicity data results of <b>EIN</b> obtained from the MTT assay.....                                   | 8  |
| Photostability experiments of <b>EIN</b> and Mito Tracker Red.....                                         | 9  |
| Confocal laser fluorescence microscopic images treated with 10 μM <b>EIN</b> .....                         | 9  |
| Characterization.....                                                                                      | 10 |

## Materials and Measurements:

**Crystallographic Data Collection and Refinement:** The single-crystal X-ray data were collected with a Bruker SMART APEX II CCD instrument with graphite monochromatic Mo-K $\alpha$  radiation ( $\lambda = 0.71073 \text{ \AA}$ ) at 298K. The data restorations and sets were corrected by the SAINT and SADABS programs respectively. The structure of sensor **EIN** was solved by direct methods and refined by full-matrix least-squares methods with the SHELX-97 program package. All the non-hydrogen atoms were refined anisotropically while hydrogen atoms attached to the carbon and oxygen atoms were placed in the calculated positions and in the riding model approximation. The crystallographic details are provided in **Table S1** and **Fig. S1**. The selected bond lengths and angles are given in Supporting Information, **Table S2**. Crystallographic data have been deposited at the Cambridge Crystallographic Data Center, the numbers is 1449562.

**Cytotoxicity test:** HepG2 cells growing in the log phase were seeded into 96-well plates ( $\sim 1 \times 10^4$  cells/well) and allowed to adhere for 24h. **EIN** stock solutions were diluted by fresh medium in to desired concentration (10, 20, 30, 40, 50  $\mu\text{M}$ ). The cell medium was then exchanged by different concentrations of **EIN** medium solutions. They were then incubated at 37 °C in 5% CO $_2$  for 24 h before cell viability was measured by the MTT assay. The cell medium solutions were exchanged by 100  $\mu\text{L}$  of fresh medium, followed by the addition of 10  $\mu\text{L}$  (5 mg / mL) MTT solution to each well. The cell plates were then incubated at 37 °C in 5% CO $_2$  for 4 h. Absorbance was measured at 450 nm. The absorbance measured for an untreated cell population under the same experimental conditions was used as the reference point to establish 100% cell viability. Duplicated experiments have been tested.

**Cell culture and staining:** For HepG2 cells (liver hepatocellular carcinoma, ATCC No. HB-8065), the medium used was Dulbecco's modified Eagle's medium (DMEM) supplemented with 10% fetal calf serum (FCS, GIBCO), penicillin and streptomycin, L-glutamine and fungizone. For live cell confocal laser scanning microscopy experiment, HepG2 cells were seeded in 24-well glass bottom plate (In Vitro

Scientific, P24-1.5H-N) at density of 10,000, and incubated for 72-96 hours at 37 °C in 95% air 5% CO<sub>2</sub> in order to allow the cells to reach ~90% confluence, the medium changed every two days. **EIN** was prepared as 1mM glycerol solution, and dilute in culture medium at 10 μM for 30 min at 37 °C in 95% air 5% CO<sub>2</sub> and then imaged with confocal microscopy. For colocalization experiments, **EIN** (10 μM) was incubated with HepG2 cells in DMEM for 30 min, and then the medium were replaced with fresh medium in the presence of Mito-Tracker Red (1 μM) or Lyso-Tracker Blue (1 μM) for 30 min. The 24-well plate were washed by PBS twice and imaged.

**Table S1.** Crystal data and structure refinements for **EIN**.

| Complex                                                                      | <b>EIN</b>                                                                     |
|------------------------------------------------------------------------------|--------------------------------------------------------------------------------|
| Chemical Formula                                                             | C <sub>27</sub> H <sub>33</sub> F <sub>6</sub> N <sub>2</sub> O <sub>4</sub> P |
| Formula Mass                                                                 | 594.52                                                                         |
| Crystal system                                                               | triclinic                                                                      |
| Space group                                                                  | P $\bar{1}$                                                                    |
| <i>a</i> /Å                                                                  | 10.820(6)                                                                      |
| <i>b</i> /Å                                                                  | 11.364(7)                                                                      |
| <i>c</i> /Å                                                                  | 12.581(7)                                                                      |
| $\beta$ /°                                                                   | 91.648(7)                                                                      |
| <i>V</i> (Å <sup>3</sup> )                                                   | 1424.9(14)                                                                     |
| Temperature/K                                                                | 296                                                                            |
| Absorption coefficient, $\mu$ /mm <sup>-1</sup>                              | 0.171                                                                          |
| No. of reflections measured                                                  | 5049                                                                           |
| No. of independent reflections                                               | 2318                                                                           |
| R <sub>int</sub>                                                             | 0.0469                                                                         |
| No. of formula units per unit cell , <i>Z</i>                                | 2                                                                              |
| <i>R</i> <sub>1</sub> , <i>wR</i> <sub>2</sub> [ <i>I</i> ≥ 2σ ( <i>I</i> )] | 0.0829, 0.2277                                                                 |
| <i>R</i> <sub>1</sub> , <i>wR</i> <sub>2</sub> [all data]                    | 0.1751, 0.2624                                                                 |

|                                                   |               |
|---------------------------------------------------|---------------|
| GOF                                               | 1.105         |
| Largest diff. peak and hole( $e\text{\AA}^{-3}$ ) | 0.777, -0.402 |

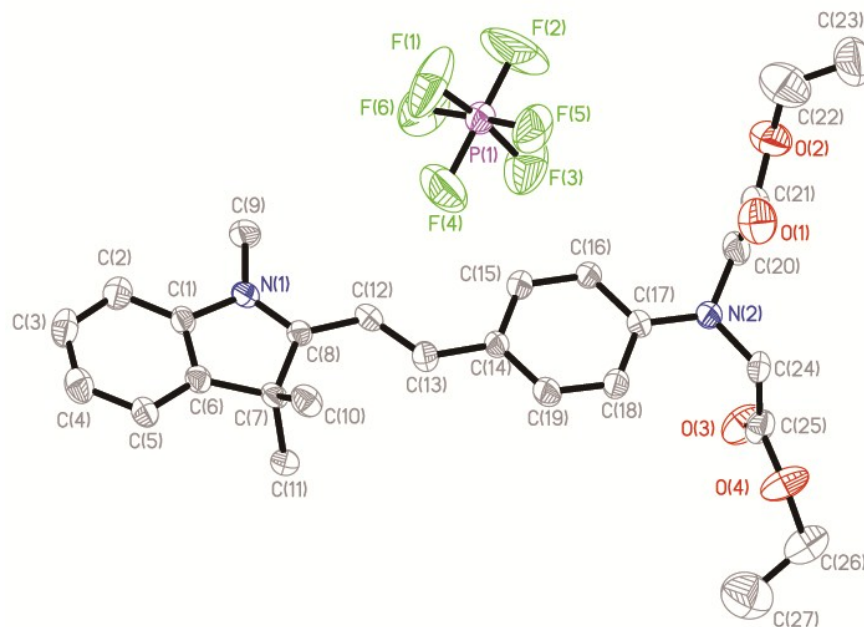

**Fig. S1** The asymmetric unit of **EIN** with displacement ellipsoids at the 50% probability level. H atoms have been omitted for clarity.

**Table S2.** Selected bond lengths / $\text{\AA}$  and angles / $^\circ$  for **EIN**.

|                  |           |                  |           |
|------------------|-----------|------------------|-----------|
| C(8)-N(1)        | 1.318(5)  | C(17)-N(2)       | 1.376(6)  |
| C(21)-O(1)       | 1.183(7)  | C(25)-O(3)       | 1.188(7)  |
| C(1)-C(6)        | 1.372(5)  | C(12)-C(13)      | 1.345(6)  |
| F(5)-P(1)        | 1.551(5)  | C(9)-N(1)        | 1.451(5)  |
| C(9)-N(1)-C(8)   | 127.76(3) | O(3)-C(25)-C(24) | 126.05(5) |
| C(8)-C(12)-C(13) | 123.78(4) | O(4)-C(25)-O(3)  | 122.07(5) |
| C(24)-N(2)-C(20) | 117.31(4) | C(23)-C(22)-O(2) | 117.50(1) |
| C(1)-C(1)-C(6)   | 123.86(4) | F(2)-P(1)-F(5)   | 90.22(3)  |

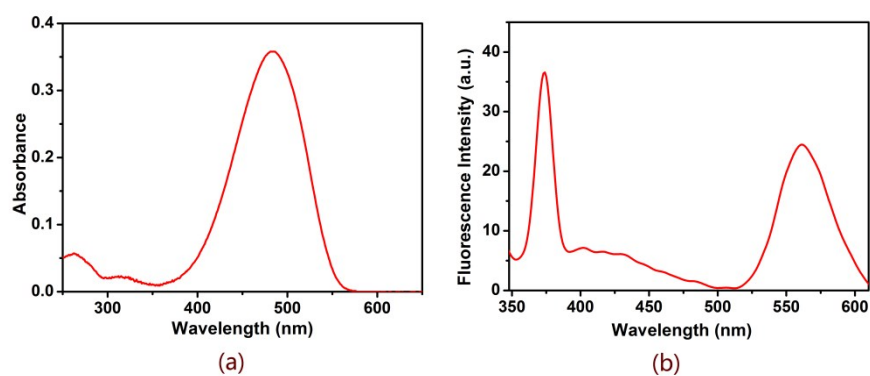

**Fig. S2** The linear absorption (a) and emission spectra (b) of **EIN** in H<sub>2</sub>O buffered with HEPES.

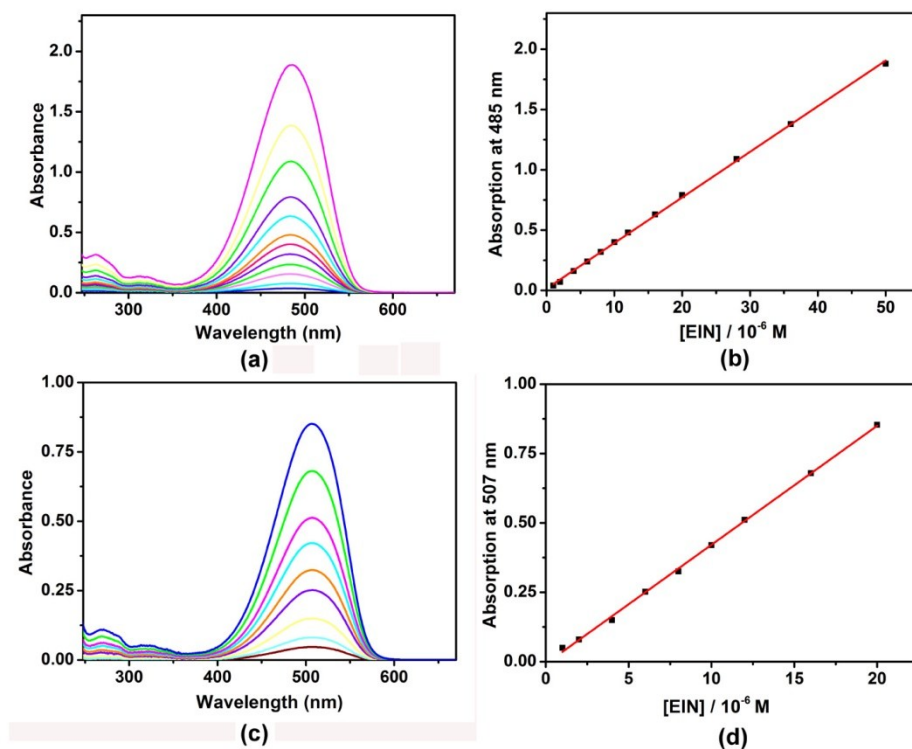

**Fig. S3** (a) and (b) Absorption spectra and plot of intensity against the concentration of **EIN** in H<sub>2</sub>O buffered with HEPES. (c) and (d) Absorption spectra and plot of intensity against the concentration of **EIN** in pure glycerol solution.

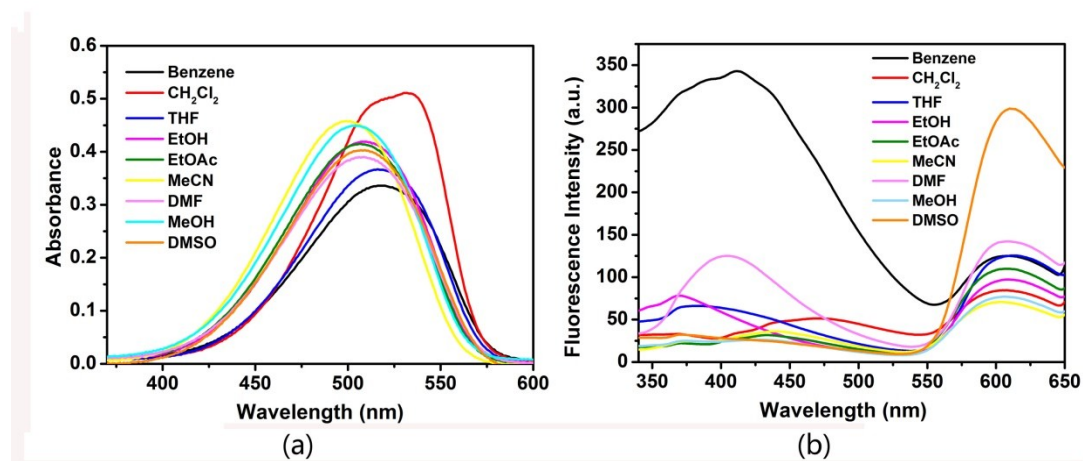

**Fig. S4** The linear absorption (a) and emission spectra upon excited at 330 nm (b) of EIN in different solvents with different polarities with a concentration of 10  $\mu$ M.

**Table. S3** Single-photon-related photophysical properties of EIN in different solvents.

| Solvents                        | $\lambda_{\max}^{\text{abs}}$ (nm) | $\lambda_{\max}^{\text{em}}$ (nm) | Stokes Shift(nm) |
|---------------------------------|------------------------------------|-----------------------------------|------------------|
| Benzene                         | 516                                | 412, 607                          | 82, 277          |
| CH <sub>2</sub> Cl <sub>2</sub> | 531                                | 470, 608                          | 140, 278         |
| THF                             | 516                                | 387, 613                          | 48, 283          |
| EtOH                            | 510                                | 369, 609                          | 39, 279          |
| EtOAc                           | 507                                | 433, 607                          | 103, 277         |
| MeCN                            | 499                                | 440, 603                          | 110, 273         |
| DMF                             | 506                                | 404, 607                          | 74, 277          |
| MeOH                            | 504                                | 428, 605                          | 98, 275          |
| DMSO                            | 507                                | 371, 610                          | 41, 280          |

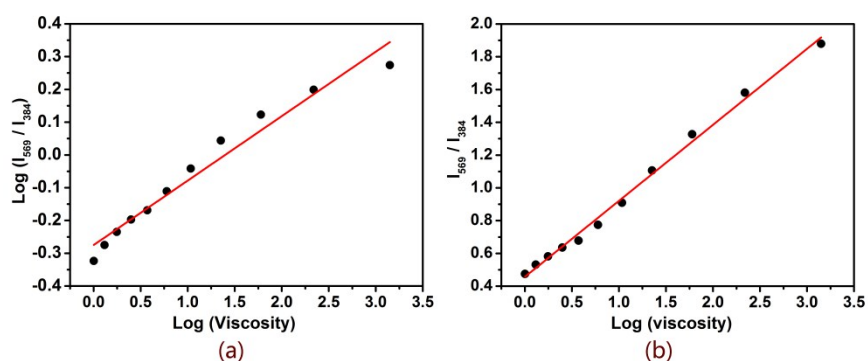

**Fig. S5** (a) The linear response between  $\log(I_{569}/I_{384})$  and  $\log(\text{viscosity})$  in the water / glycerol solvent ( $R^2 = 0.960$ ); (b) The linear response between  $I_{569}/I_{384}$  and  $\log(\text{viscosity})$  in the water / glycerol solvent ( $R^2 = 0.994$ ).

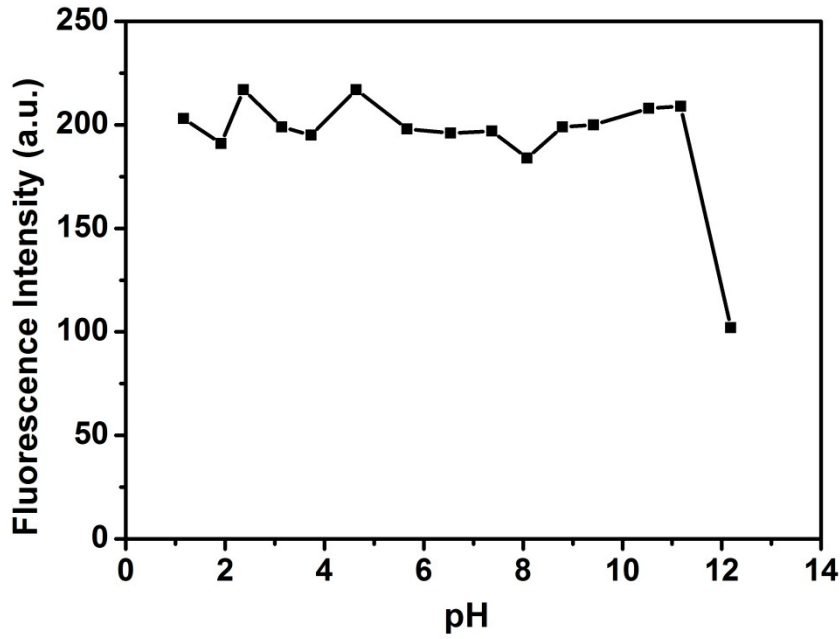

Fig. S6 The fluorescent intensities for E1N at varied PH values.

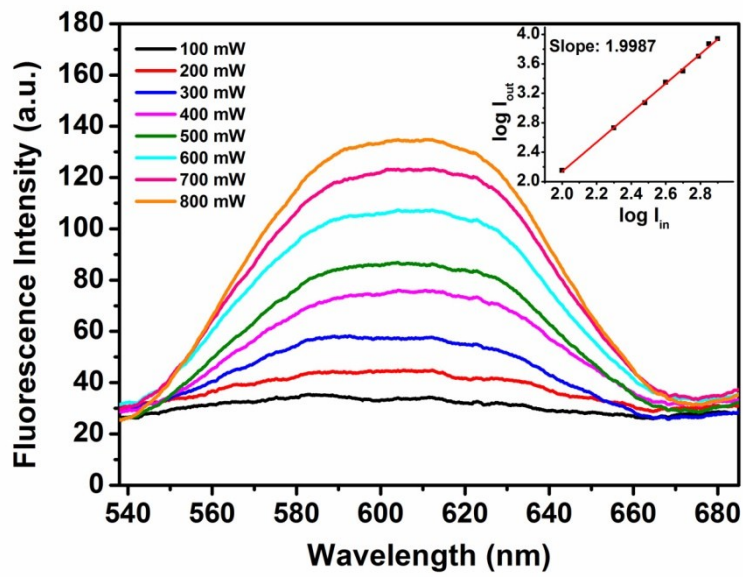

Fig. S7 The two-photon fluorescence spectra of E1N excited by the different input laser power at the optimum wavelength, the inset shows the two-photon absorption verification which  $I_{in}$  and  $I_{out}$  represent the input laser power and output fluorescence, respectively.

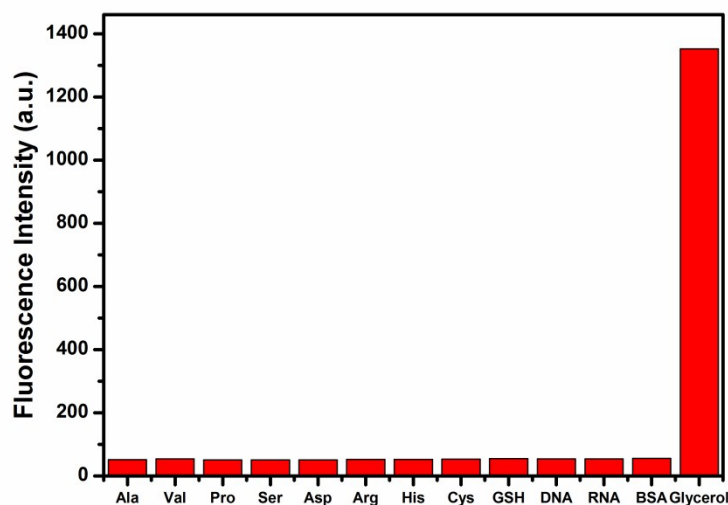

**Fig. S8** The fluorescence spectra titration of EIN (10  $\mu\text{M}$ ) in pure HEPES buffer (pH = 7.4) by Ala (100  $\mu\text{M}$ ); Val (100  $\mu\text{M}$ ); Pro (100  $\mu\text{M}$ ); Ser (100  $\mu\text{M}$ ); Asp (100  $\mu\text{M}$ ); Arg (100  $\mu\text{M}$ ); His (100  $\mu\text{M}$ ); Cys (100  $\mu\text{M}$ ); GSH (100  $\mu\text{M}$ ); DNA (200  $\mu\text{M}$ ); RNA (200  $\mu\text{M}$ ); BSA (200  $\mu\text{M}$ ) and 99.9 % glycerol during 120 min (excited at 490 nm).

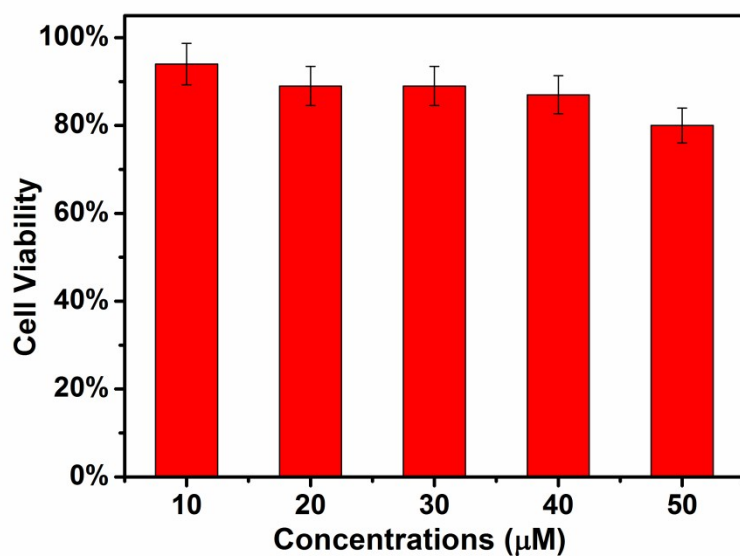

**Fig. S9** Cytotoxicity data results of EIN obtained from the MTT assay of HepG2 cells.



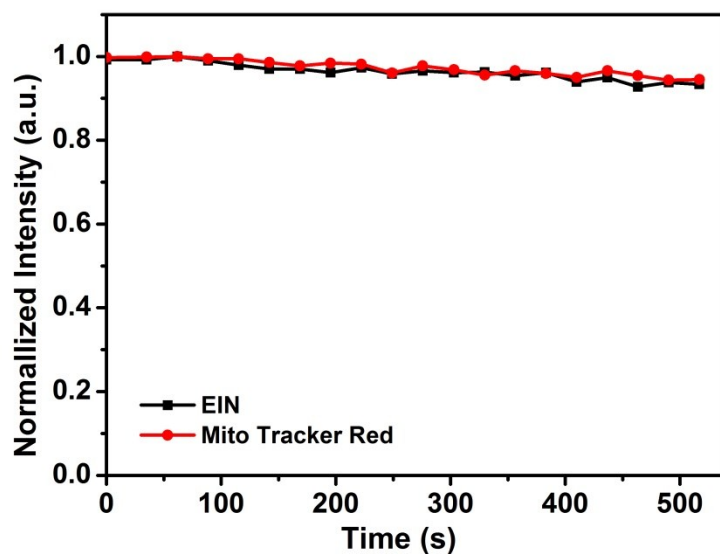

**Fig. S10** Photostability experiments of **EIN** and Mito Tracker Red with 10  $\mu$ M, respectively.

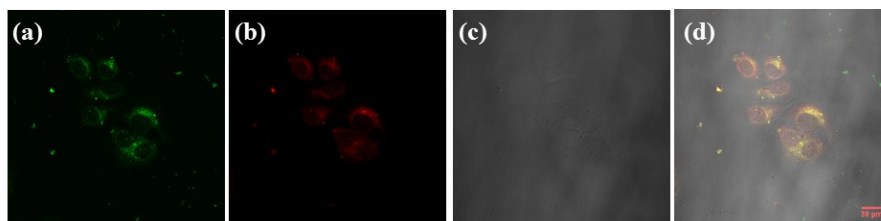

**Fig. S11** Confocal laser fluorescence microscopic images of HepG2 cells treated with 10  $\mu$ M **EIN**; (a) Green channel fluorescence image detected at 520-580 nm upon excited at 488 nm; (b) Green channels fluorescence images detected at 520-580 nm upon excited at 840 nm; (c) Bright fields of HepG2 cells; (d) Merged image of (a), (b) and (c).

1. R. C. Weast, *CRC Handbook of Chemistry and Physics*, CRC Press Inc., Boca Raton, FL, USA, 68th ed., 1987, D221-D269.

<sup>1</sup>H-NMR spectra of **EIN**

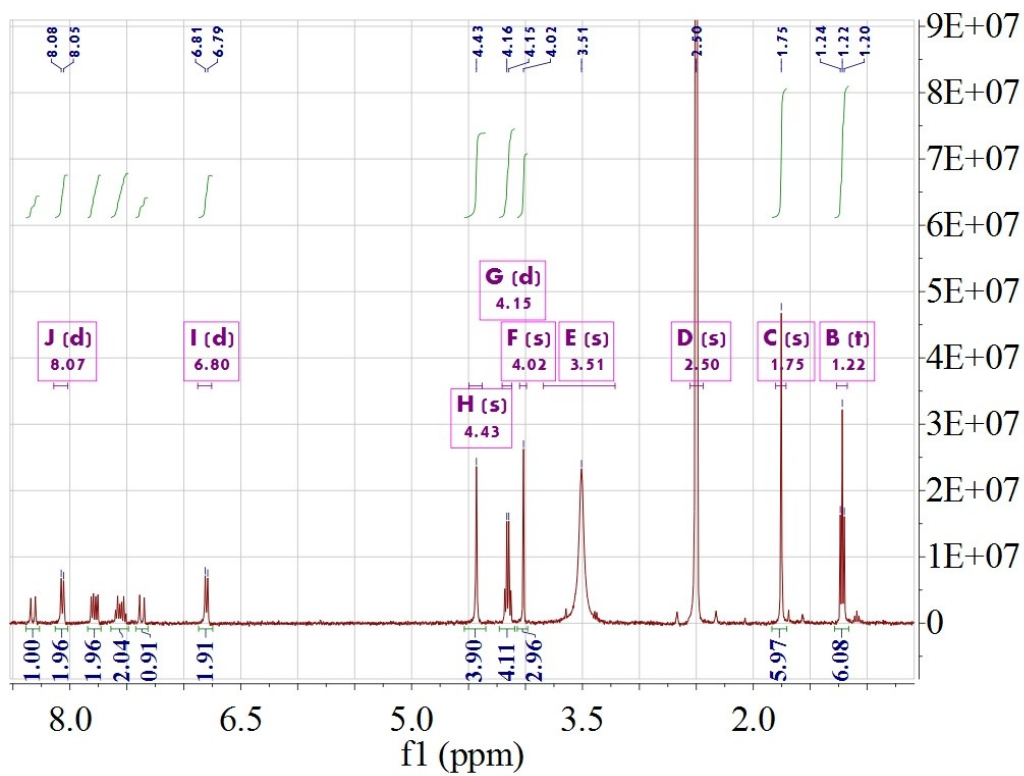

<sup>13</sup>C-NMR spectra of EIN

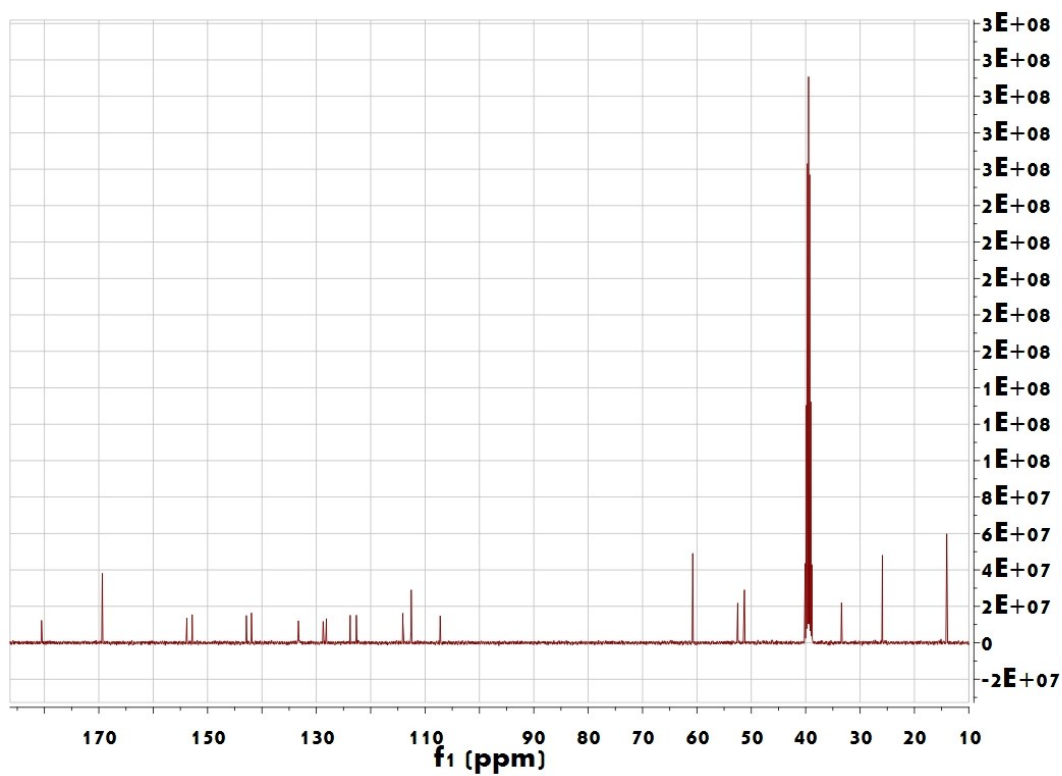

HR-MS of EIN

M1 #28 RT: 0.24 AV: 1 NL: 5.68E7  
T: FTMS + c ESI Full ms [270.00-800.00]

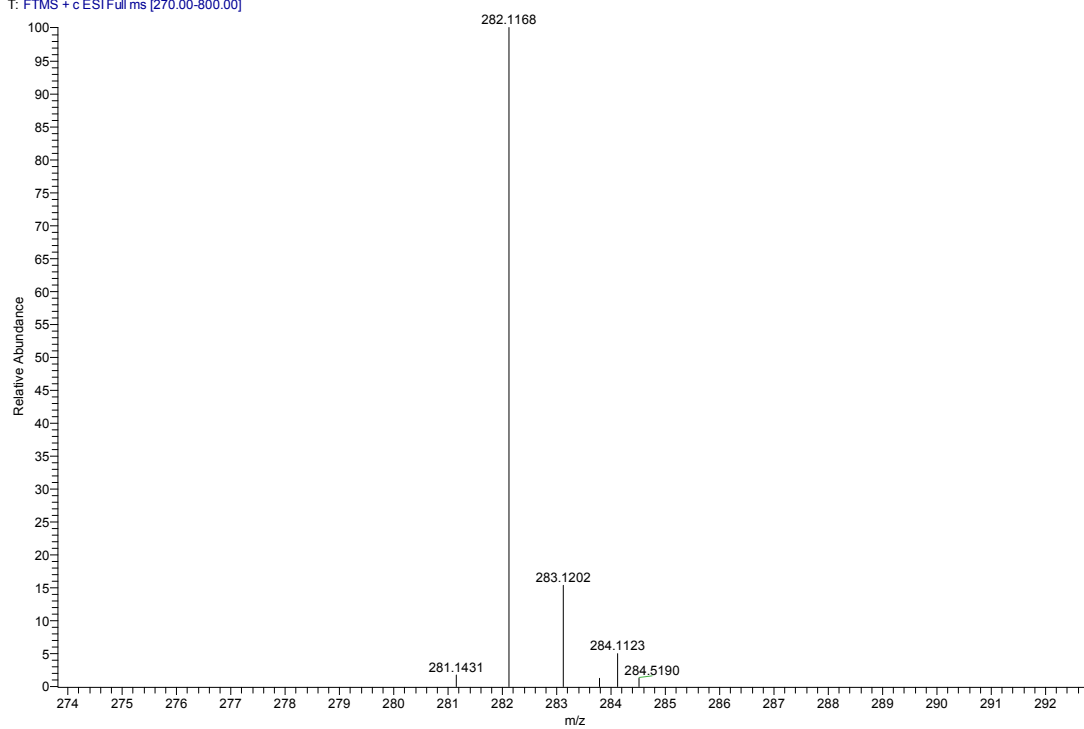

Supplement: c6tb01240j1.pdf [file c6tb01240j1.pdf]
